# Supplementary material
Source: PubMed Central journal article supplement (PMC6646127)
Supplement: ao8b00458_si_001.pdf [file ao8b00458_si_001.pdf]

# Supporting Information

## Conducting Polymer Scaffolds based on PEDOT and Xanthan Gum for Live-Cell Monitoring

*Isabel del Agua<sup>a,b</sup>, Sara Marina<sup>b</sup>, Charalampos Pitsalidis<sup>b,d</sup>, Daniele Mantione<sup>b</sup>, Magali Ferro<sup>b</sup>,  
Donata Iandolo<sup>b,d</sup>, Ana Sanchez- Sanchez<sup>c</sup>, George G. Malliaras<sup>b,c</sup>, Róisín M. Owens<sup>b,d</sup>,\* David  
Mecerreyes<sup>a,e\*</sup>*

<sup>a</sup> POLYMAT University of the Basque Country UPV/EHU, Joxe Mari Korta Center, Avda. Tolosa 72, 20018 Donostia-san Sebastian, Spain

<sup>b</sup> Department of Bioelectronics, Ecole Nationale Supérieure des Mines, CMP-EMSE, MOC, 13541 Gardanne, France

<sup>c</sup> University of Cambridge, Dept. of Eng., Electrical Eng. Division, 9 JJ Thomson Avenue, Cambridge, CB3 0FA, UK

<sup>d</sup> Department of Chemical Engineering and Biotechnology, Philippa Fawcett Drive, Cambridge, CB3 0AS, UK

<sup>e</sup> Ikerbasque, Basque Foundation for Science, E-48011 Bilbao, Spain

E-mails: david.mecerreyes@ehu.es, rmo37@cam.ac.uk

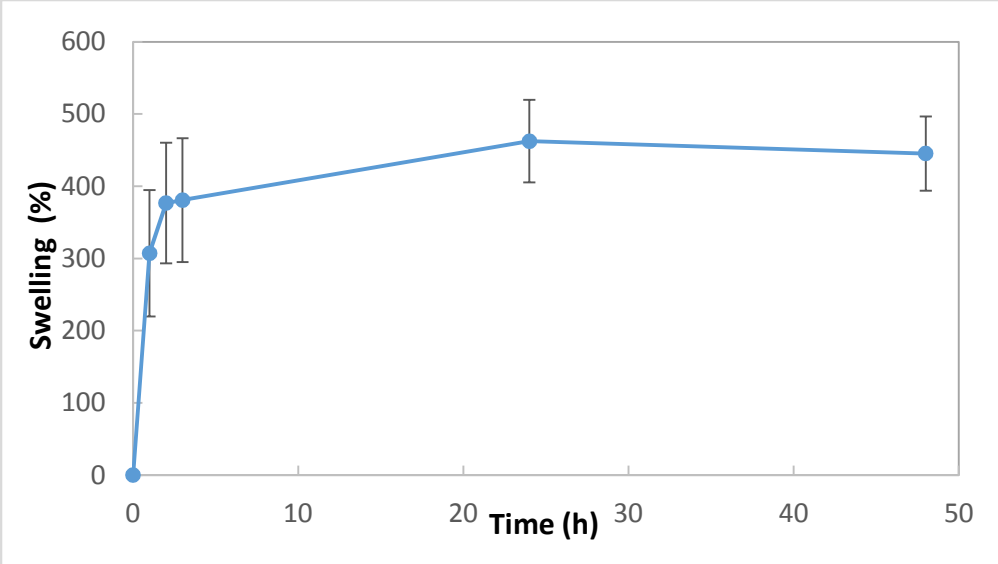

**Figure S1.** Scaffold PEDOT:xanthan gum (0.5:0.5) 2%wt swelling ratio in cell media measured at t=0, 1, 2, 3, 24 and 48h.
